# Supplementary material for: Biodiversity as a multidimensional construct: a review, framework and case study of herbivory's impact on plant biodiversity
Source: PubMed Central journal article supplement (PMC5204135; doi:10.1098/rspb.2015.3005), 2016-12-14
Supplement: rspb20153005supp1.pdf [file rspb20153005supp1.pdf]

1 Biodiversity as a multidimensional construct: Alternative SEM Models and Placement of Number of Taxa

2 S. Naeem, Case Prager, Brian Weeks, Alex Varga, Dan F.B. Flynn, Kevin Griffin, Robert Muscarella,  
3 Matthew Palmer, Stephen Wood, William Schuster.

4 In Structural Equation Modeling (SEM), each model represents a hypothetical set of causative and  
5 correlative relations (linkages) among measured and unmeasured variables. In the absence of any  
6 specific model of interest, there are several possible models, each reflecting possible alternative  
7 patterns of linkages among variables. Thus, one can examine a specific model that reflects a specific  
8 structure or one can explore all identified, admissible models to find the model that best fits or predicts  
9 the data. "Identified" means that the number of known parameters exceeds the number of unknown  
10 parameters, thus the model may be resolvable. In many cases, however, even if the number of knowns  
11 exceeds unknowns, the data may yield an inadmissible model. A model is deemed inadmissible if the  
12 analytical algorithm yielded negative residual variances, an  $R^2 > 1$ , or an otherwise inadmissible solution  
13 [1]. In some cases, a model is excluded because it could not be resolved because the iteration limit set  
14 by the algorithm was reached and increasing the limit did not change the outcome. Thus, many models  
15 can be constructed for a single set of variables, though generally only a fraction of them make sense  
16 (e.g., biologically), can be identified, provide admissible results for a specific set of data, and can be  
17 resolved within the iteration limit of the algorithm.

18 This exploratory approach in which many models are explored for a single set of variables, or  
19 exploratory SEM, can identify the best predictive model for a specific data set. The most predictive  
20 model, however, may not reflect the full set of linkages that are relevant; it only reflects linkages  
21 supported by the data. A different set of data may yield a different model as the best predictor. The  
22 full model and its rationale are therefore critical parts of the exercise (for a discussion of these and  
23 related issues concerning SEM, see [2-7]).

24 In this study, the SEM-framework (Fig. 2) and its rationale are explained in the main text. Our single, full  
25 model (Fig. 3, Fig. S1 A) is derived directly from the SEM framework and is based, in part, on the  
26 biological argument that the number of taxa (i.e., species richness) covaries with most, if not all  
27 biodiversity metrics (Fig S1 A and Fig. 2). However, there may be reasons to treat the number of taxa  
28 differently. The number of taxa may be treated as a variable that directly influences the ecosystem  
29 property (Fig. S1A). Alternatively, the number of taxa may be treated as a variable that directly  
30 influences biodiversity metrics (Fig S1 C). Finally, another alternative would be to treat the number of  
31 taxa as a variable that directly influences the taxonomic diversity dimension (TD), but not functional or  
32 phylogenetic diversity dimensions (FD or PD, respectively, Fig. S1 D). There are many more alternatives,  
33 but we examine these four (Fig. S1 A-D) to serve two purposes. First, we examine these alternatives to  
34 address possible differences in the way researchers may wish to treat number of taxa in  
35 multidimensional biodiversity analyses. Second, we simply wish to illustrate the exploratory approach  
36 as a supplementary exercise.

37

38 Methods

39 We performed an exploratory SEM approach in which we examined the four alternative models shown  
40 in Figure S1 and described above. We used the Specification Search function in the SEM statistical  
41 software package, Amos [1], to search for alternative structures for each of the four models to  
42 determine if there were alternatives that better fit our data (or were potentially more predictive) than  
43 the full model. Alternative structures consisted of the full set of possible structures in which one or  
44 more links were removed. Only models that are identified and admissible were considered. Unresolved  
45 models that occurred because the iteration limit, initially set at 50 iterations, were rerun with the limit  
46 set to 100. This procedure did not increase the number of models resolved, thus we considered these  
47 models as effectively unresolvable for the data to hand.

48

## 49 Results

50 In Table S1, we provide the total number of possible alternative models for each of the four models  
51 shown in Figure S1. There are thousands of possible alternative models for each model shown in Figure  
52 S1 (Table S1), the vast majority of which are either unidentified, inadmissible, or failed to be resolved  
53 before the algorithm's iteration limit was reached. The model treating number of taxa as a covariate  
54 (Fig. S1 A) was identified and admissible for plots with or without exposure to herbivory, but the  
55 alternatives (Fig. S1 B-D) did not provide interpretable results (Table S1). By "interpretable," we mean  
56 being able to compare model outcomes between plots exposed to or protected from herbivory. Only  
57 one full model was identified; the model presented in Figure S1 D in which number of taxa was linked to  
58 the taxonomic diversity dimension (TD) for plots protected from herbivory. Because the full model for  
59 plots exposed to herbivory was inadmissible, we cannot compare whether different dimensions had  
60 different influences on the ecosystem property (total cover) between the two treatments. Selecting  
61 admissible alternatives would allow for predicting total cover based on diversity metrics or dimensions,  
62 but our question concerned how the full models compared, not how best to predict total cover. All  
63 models, full and alternatives, rejected the hypothesis that they fit the data, thus, as discussed in the  
64 text, that although model fit methods in SEM remain under discussion [8-10], specific predictions could  
65 be suspect.

66

## 67 Discussion

68 Different researchers may have cause to deviate from our suggested generic model (Fig. 2), but for our  
69 specific example, three alternative approaches (Fig. S1 B-D) in which the number of taxa (i.e., species  
70 richness) was treated differently, did not provide interpretable results. The large number of  
71 inadmissible and unresolved models most likely stems from insufficient data and it is possible the  
72 alternative treatments of number of taxa we explored may work where more data are available.

73 It is important to note that we cannot, in our case study, shed light onto whether alternative models (Fig  
74 S1 B-D) given the data we have. We have provided our rationale for the model presented in Fig. 2, but  
75 further work, different systems, and different questions may lead to alternative models better suiting

76 different investigations. We also do not advocate nor discourage exploratory analyses of multi-  
77 dimensional models of biodiversity's influence on ecosystem function as done here in this  
78 supplementary material for our case study. We focused our analyses on testing the biologically  
79 plausible model in which the number of taxa was considered a covariate of all biodiversity metrics (Fig.  
80 2) and the data applied to the full models showed multidimensional biodiversity effects to differ  
81 between herbivore-exposed and herbivore protected plots. However, when an alternative model is  
82 more appropriate for the hypothesis under investigation, such as any of the three alternatives illustrated  
83 in Figure S1 (B-D), such models should be examined. As in all SEM-based studies, the number of possible  
84 models can be fairly large and many may not be identifiable (too many unknowns) or admissible  
85 (unresolvable by analytical algorithms when sample sizes are small), as in our case.

86

Table S1. Exploratory Structural Equation Model (SEM) for multiple dimensions of biodiversity applied to understory forest vegetation at Black Rock Forest, New York, exposed to or protected from deer herbivory. For each SEM model in which the treatment of number taxa is different (Fig. S1 A-D), a specification search was conducted using Amos and basic outcomes of the search are tabulated here. AIC is the Aikake Information Criterion which measures the likelihood of the model given the data and aids in model selection among a set of comparable models. The AIC for the best model is provided (maximum AIC is provided parenthetically); lower values reflect better fits. Herbivory was either present (i.e. "Yes") or not (i.e., exclosures were present, "No"). P reflects probability that model fits the data if P (<0.05 means that model was rejected as a good fit to the data). Results for the full model (i.e., all links illustrated in Fig. S1 A-D are present) are provided in the right most column. If the full model was admissible, the R<sup>2</sup> for the model's prediction of total cover is provided parenthetically.

|                                             | Number of models | Number of Admissible Models | Herbivory | Best Fit Model |                                     |        | Full model                                   |
|---------------------------------------------|------------------|-----------------------------|-----------|----------------|-------------------------------------|--------|----------------------------------------------|
|                                             |                  |                             |           | Parameters     | AIC of best fit (poorest fit) model | P      | Admissible (R <sup>2</sup> ) or Inadmissible |
| Covariate with Dimensions                   | 32,768           | 14                          | Yes       | 21             | 174.0 (187.1)                       | <0.001 | Admissible (0.76)                            |
|                                             |                  | 7                           | No        | 16             | 179.0 (187.1)                       | <0.001 | Admissible(0.19)                             |
| Directly influences Total Cover (Fig. S1 B) | 8,192            | 8                           | Yes       | 17             | 167.6 (176.5)                       | <0.001 | Inadmissible                                 |
|                                             |                  | 7                           | No        | 20             | 170.2 (187.1)                       | <0.001 | Inadmissible                                 |
| Influences Dimensions (Fig. S1 C)           | 262,144          | 163                         | Yes       | 18             | 117.9 (176.5)                       | <0.001 | Inadmissible                                 |
|                                             |                  | 112                         | No        | 21             | 127.4 (179.0)                       | <0.001 | Inadmissible                                 |
| Directly influences TD (Fig. S1 D)          | 8,192            | 6                           | Yes       | 14             | 169.4 (177.4)                       | <0.001 | Inadmissible                                 |
|                                             |                  | 3                           | No        | 16             | 179.0 (187.1)                       | <0.001 | Admissible (0.65)                            |

88

89

90

91

Table S2 Correlation matrix for biodiversity metrics used in structural equation modeling example (see Fig. 3).  
Pearson correlations. Bolded numbers mean  $P < 0.05$ , Bonferroni corrected.

|                       | Shannon     | Simpson     | FD<br>Divergence | FD<br>Evenness | FD<br>Richness | Phylogenetic<br>Faith | Phylogenetic<br>MPD |
|-----------------------|-------------|-------------|------------------|----------------|----------------|-----------------------|---------------------|
| Simpson               | <b>0.96</b> |             |                  |                |                |                       |                     |
| FD<br>Divergence      | -0.01       | -0.14       |                  |                |                |                       |                     |
| FD<br>Evenness        | 0.07        | 0.02        | -0.10            |                |                |                       |                     |
| FD<br>Richness        | 0.48        | 0.33        | 0.58             | -0.14          |                |                       |                     |
| Phylogenetic<br>Faith | 0.49        | 0.33        | 0.58             | -0.14          | <b>0.97</b>    |                       |                     |
| Phylogenetic<br>MPD   | <b>0.93</b> | <b>0.88</b> | 0.07             | 0.01           | 0.60           | <b>0.62</b>           |                     |
| Number of<br>Taxa     | 0.52        | 0.37        | 0.53             | -0.18          | <b>0.95</b>    | <b>0.97</b>           | 0.59                |

94 Figure Captions

95 Figure S1. Four possible SEM models for the relationship between multiple dimensions of biodiversity  
96 and an ecosystem property; TD, FD, and PD related to total vegetation cover in understory vegetation  
97 plots at Black Rock Forest. See caption to Figure 3 for further detail. A. Number of species is a covariate  
98 of TD, FD, and PD. B. Number of taxa as a variable that directly influences the ecosystem property. C.  
99 Number of taxa directly influences biodiversity metrics. D. Number of taxa directly influences the  
100 taxonomic diversity dimension.

101

102

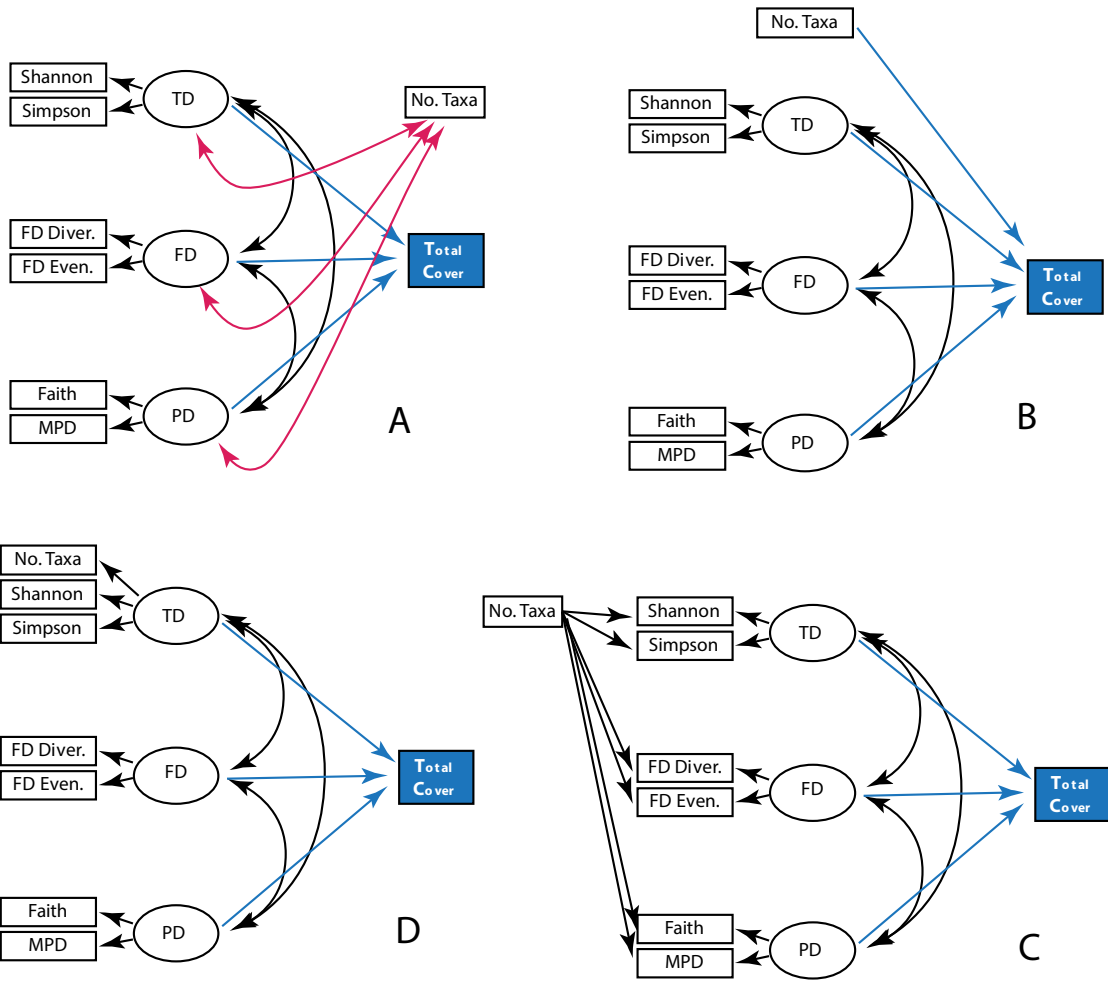

103

104

105 Figure S1

106

107 Literature cited

108

109

- 110 1. Arbuckle J.L., Wothke W. 1999 *Amos 4.0 Users Guide*. Chicago, SmallWaters Corporation; 452 p.
- 111 2. Grace J.B., Schoolmaster D.R., Guntenspergen G.R., Little A.M., Mitchell B.R., Miller K.M.,  
112 Schweiger E.W. 2012 Guidelines for a graph-theoretic implementation of structural equation modeling.  
113 *Ecosphere* **3**(8), art73. (doi:10.1890/ES12-00048.1).
- 114 3. Byrne B.M. 2013 *Structural equation modeling with AMOS: Basic concepts, applications, and*  
115 *programming*, Routledge.
- 116 4. Marcoulides G.A., Schumacker R.E. 2013 *Advanced structural equation modeling: Issues and*  
117 *techniques*, Psychology Press.
- 118 5. Grace J.B., Pugseck B.H. 1997 A structural equation model of plant species richness and its  
119 application to a coastal wetland. *American Naturalist* **149**, 436-460.
- 120 6. Shipley B. 2001 *Cause and Correlation in Biology: A User's Guide to Path Analysis, Structural*  
121 *Equations, and Causal Inference*. Cambridge, Cambridge University Press; 316 p.
- 122 7. Hershberger S.L., Marcoulides G.A., Parramore M.M. 2003 Structural equation modeling: An  
123 introduction. In *Structural Equation Modeling* (eds. Pugeseck B.H., Tomer A., EVon Eye A.). Cambridge,  
124 Cambridge University Press.
- 125 8. Barrett P. 2007 Structural equation modelling: Adjudging model fit. *Personality and Individual*  
126 *Differences* **42**(5), 815-824. (doi:<http://dx.doi.org/10.1016/j.paid.2006.09.018>).
- 127 9. Moshagen M. 2012 The Model Size Effect in SEM: Inflated Goodness-of-Fit Statistics Are Due to  
128 the Size of the Covariance Matrix. *Structural Equation Modeling: A Multidisciplinary Journal* **19**(1), 86-98.  
129 (doi:10.1080/10705511.2012.634724).
- 130 10. Kenny D.A., Kaniskan B., McCoach D.B. 2015 The Performance of RMSEA in Models With Small  
131 Degrees of Freedom. *Sociological Methods & Research* **44**(3), 486-507.  
132 (doi:10.1177/0049124114543236).

133

134
